# Supplementary material for: Impact of Water Regimes and Amendments on Inorganic Arsenic Exposure to Rice
Source: MDPI journal article supplement (doi:10.3390/ijerph18094643), 2021-04-27
Supplement: s1 [file s1]

## Supplementary tables

Table S1. Initial physicochemical properties of experimental soil

| Parameters                         |           |
|------------------------------------|-----------|
| Sand (%)                           | 25.2      |
| Silt (%)                           | 34.9      |
| Clay (%)                           | 39.9      |
| Texture                            | Clay loam |
| pH                                 | 7.59      |
| Organic carbon (%)                 | 0.81      |
| Amorphous Fe (g kg <sup>-1</sup> ) | 1.92      |
| Total As (mg kg <sup>-1</sup> )    | 11.62     |

Data represents mean of triplicate analysis, values varied by less than 5%

Table S2. Comparisons between certified and measured values of reference material.

| SRM        |                 | Inorganic As  | Total As      |
|------------|-----------------|---------------|---------------|
| NIST 1568b | Measured value  | 0.087 ± 0.006 | 0.268 ± 0.011 |
|            | Certified value | 0.092         | 0.291         |

Table S3. Recovery (%) of different arsenic species and total arsenic in different sample matrices.

| Sample Type           | Spike Level<br>(mg/kg) | Arsenite   | Arsenate   | Total As |
|-----------------------|------------------------|------------|------------|----------|
| Grain ( <i>n</i> = 6) | 0.02                   | 97.4 ± 3.4 | 91.6 ± 3.8 | 98 ± 5.0 |

Table S4. Available Si and amorphous Fe oxide concentration in soil subject to water regime and soil amendment

| Water regime | Soil amendment | Available Si<br>(mg/kg) | Amorphous Fe<br>oxide<br>(mg/kg) |
|--------------|----------------|-------------------------|----------------------------------|
| Flooded      | Control        | 340                     | 1560                             |
|              | Silicon + NPK  | 384                     | 1482                             |
|              | Iron + NPK     | 388                     | 1944                             |
|              | Silicon + FYM  | 392                     | 1380                             |
|              | Iron + FYM     | 372                     | 2274                             |
|              | Silicon + VC   | 404                     | 1746                             |
|              | Iron + VC      | 336                     | 1980                             |
|              |                |                         |                                  |
| Aerobic      | Control        | 420                     | 2076                             |
|              | Silicon + NPK  | 488                     | 2815                             |
|              | Iron + NPK     | 452                     | 3022                             |

|  |               |     |      |
|--|---------------|-----|------|
|  | Silicon + FYM | 464 | 2753 |
|  | Iron + FYM    | 472 | 3298 |
|  | Silicon + VC  | 512 | 2539 |
|  | Iron + VC     | 464 | 3353 |
